# Supplementary material
Source: publisher figshare collection journal article supplement (https://acs.figshare.com/ndownloader/files/7989988)
Supplement: Supplementary file 1 [file 7989988]

Compound_ID	SMILES	IC50/ADM (¦ÌM)(ADM-resistance reversal activity of 1.0 ¦ÌM target compounds in K562/A02 cells)	Reversal Fold	Other compound property (optional)
12a	COC(C(OC)=C1)=CC2=C1CCN(C2)CCC3=CC=C(NC4=NC(C5=CC=CC=C5)=NC6=CC=CC=C64)C=C3	11.66 ¡À 1.04	7.7
12b	COC(C(OC)=C1)=CC2=C1CCN(C2)CCC3=CC=C(NC4=NC(C5=C(OC)C=CC=C5)=NC6=CC=CC=C64)C=C3	8.24 ¡À 0.78	10.9
12c	COC(C(OC)=C1)=CC2=C1CCN(C2)CCC3=CC=C(NC4=NC(C5=CC=CC(OC)=C5)=NC6=CC=CC=C64)C=C3	6.15 ¡À 0.69	14.6
12d	COC(C(OC)=C1)=CC2=C1CCN(C2)CCC3=CC=C(NC4=NC(C5=CC=C(OC)C=C5)=NC6=CC=CC=C64)C=C3	11.37 ¡À 1.31	7.9
12e	COC(C(OC)=C1)=CC2=C1CCN(C2)CCC3=CC=C(NC4=NC(C5=CC=C(OC)C(OC)=C5)=NC6=CC=CC=C64)C=C3	5.22 ¡À 0.41	17.2
12f	COC(C(OC)=C1)=CC2=C1CCN(C2)CCC3=CC=C(NC4=NC(C5=CC(OC)=C(OC)C(OC)=C5)=NC6=CC=CC=C64)C=C3	14.25 ¡À 1.30	6.3
12g	COC(C(OC)=C1)=CC2=C1CCN(C2)CCC3=CC=C(NC4=NC(C5=CC=C(OCO6)C6=C5)=NC7=CC=CC=C74)C=C3	5.79 ¡À 0.41	15.5
12h	COC(C(OC)=C1)=CC2=C1CCN(C2)CCC3=CC=C(NC4=NC(C5=CC=CC(C)=C5)=NC6=CC=CC=C64)C=C3	10.09¡À 1.02	8.9
12i	COC(C(OC)=C1)=CC2=C1CCN(C2)CCC3=CC=C(NC4=NC(C5=CC=C(C)C=C5)=NC6=CC=CC=C64)C=C3	11.97 ¡À 1.22	7.5
12j	COC(C(OC)=C1)=CC2=C1CCN(C2)CCC3=CC=C(NC4=NC(C5=CC=C(C(C)(C)C)C=C5)=NC6=CC=CC=C64)C=C3	47.26 ¡À 4.21	1.9
12k	COC(C(OC)=C1)=CC2=C1CCN(C2)CCC3=CC=C(NC4=NC(C5=CC=NC=C5)=NC6=CC=CC=C64)C=C3	2.91 ¡À 0.12	30.9
12l	COC(C(OC)=C1)=CC2=C1CCN(C2)CCC3=CC=C(NC4=NC(C5=CN=CC=C5)=NC6=CC=CC=C64)C=C3	15.22 ¡À 2.21	5.9
12m	COC(C(OC)=C1)=CC2=C1CCN(C2)CCC3=CC=C(NC4=NC(C5=CC=C(C=CC=C6)C6=N5)=NC7=CC=CC=C74)C=C3	34.54 ¡À 3.72	2.6
12n	COC(C(OC)=C1)=CC2=C1CCN(C2)CCC3=CC=C(NC4=NC(C5=CC=CC([N+]([O-])=O)=C5)=NC6=CC=CC=C64)C=C3	6.70 ¡À 0.31	13.4
12o	COC(C(OC)=C1)=CC2=C1CCN(C2)CCC3=CC=C(NC4=NC(C5=CC=C([N+]([O-])=O)C=C5)=NC6=CC=CC=C64)C=C3	29.93 ¡À 3.22	3
12p	COC(C(OC)=C1)=CC2=C1CCN(C2)CCC3=CC=C(NC4=NC(C5=CC=C(Cl)C=C5)=NC6=CC=CC=C64)C=C3	14.97 ¡À 1.38	6
12q	COC(C(OC)=C1)=CC2=C1CCN(C2)CCC3=CC=C(NC4=NC(C5=CC=C(F)C=C5)=NC6=CC=CC=C64)C=C3	27.21 ¡À 2.74	3.3
12r	COC(C(OC)=C1)=CC2=C1CCN(C2)CCC3=CC=C(NC4=NC(C5=CC=CC=C5)=NC6=CC(Cl)=CC=C64)C=C3	10.95 ¡À 1.70	8.2
12s	COC(C(OC)=C1)=CC2=C1CCN(C2)CCC3=CC=C(NC4=NC(C5=CC=CC=C5)=NC6=CC(OC)=C(OC)C=C64)C=C3	8.89 ¡À 0.65	10.1
